# Supplementary material for: Homemade blenderized tube feeding improves gut microbiome communities in children with enteral nutrition
Source: PubMed Central journal article supplement (PMC10482415; doi:10.3389/fmicb.2023.1215236), 2023-08-23

Supplementary Figure S1

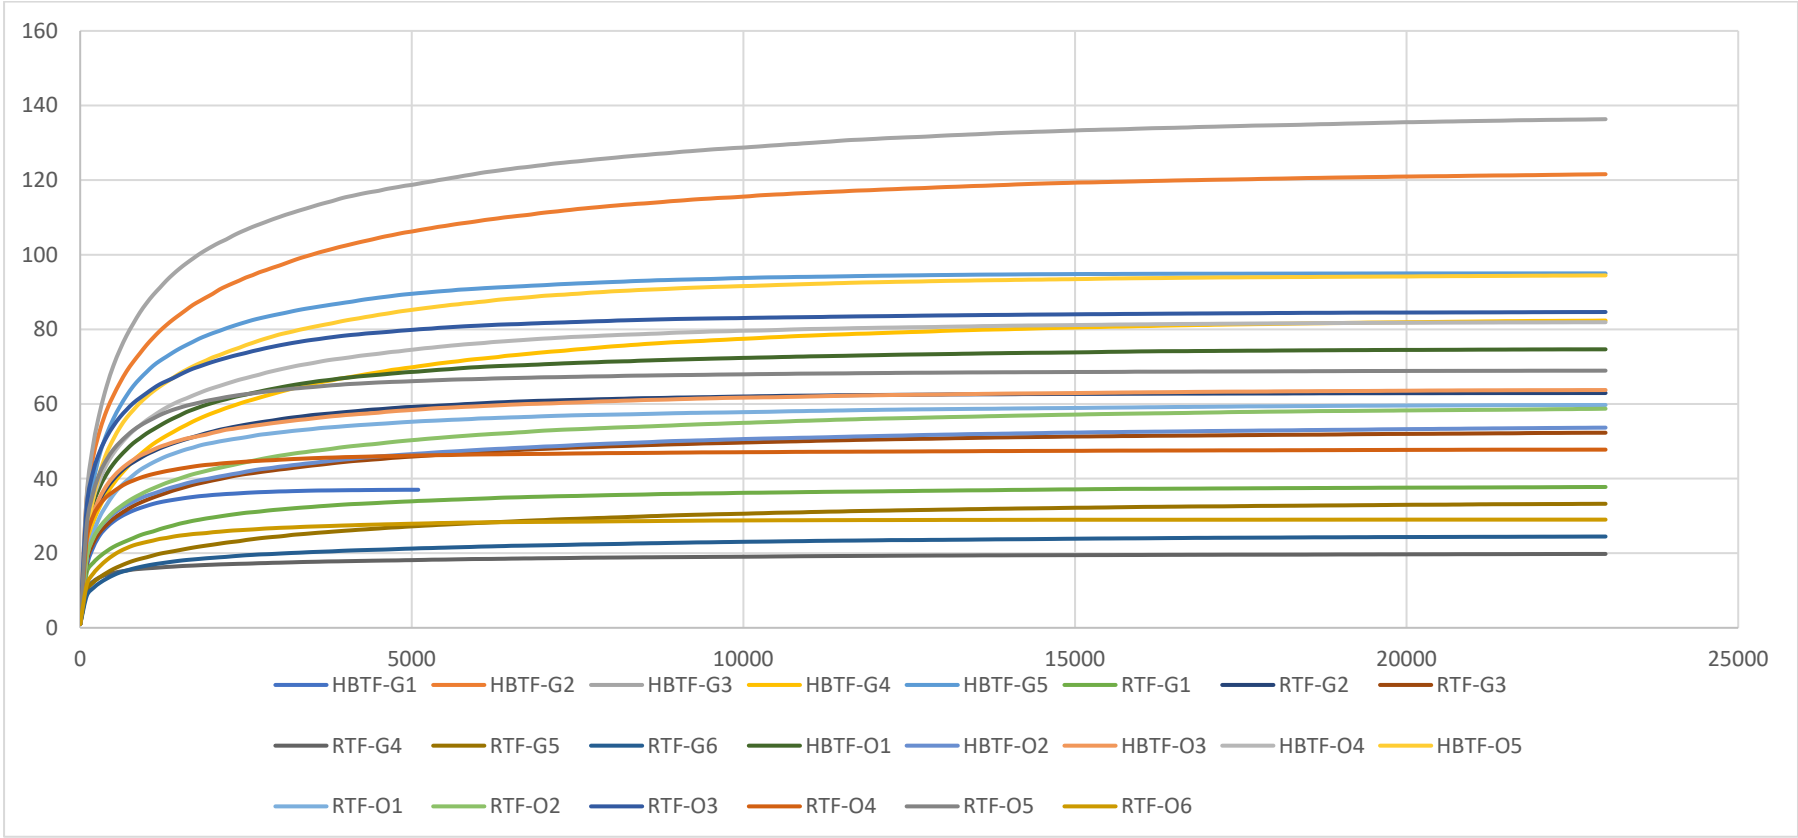

Supplement: Image_1.pdf [file Image_1.pdf]
